# Supplementary material for: Size and morphology-controlled synthesis of Ni3C nanoparticles in a TEG solution and their magnetic properties
Source: Royal Society of Chemistry journal article supplement (doi:10.1039/c6ra11916f), 2016-01-01
Supplement: c6ra11916f1.pdf [file c6ra11916f1.pdf]

## Size and morphology-controlled synthesis of Ni<sub>3</sub>C nanoparticles in a TEG solution and their magnetic properties

Yajing Zhang<sup>1\*</sup>, Yuan Zhu<sup>1</sup>, Yan Cao<sup>1</sup>, Da Li<sup>2\*</sup>, Zhidong Zhang<sup>2</sup>, Kangjun Wang<sup>1</sup>, Fu Ding<sup>1</sup>, Xiaolei Wang<sup>3</sup>, Dan Meng<sup>1</sup>, Lihui Fan<sup>1</sup>, Jing Wu<sup>1</sup>

<sup>1</sup> College of Chemical Engineering, Shenyang University of Chemical Technology, Shenyang 110142, PR China

<sup>2</sup> Shenyang National Laboratory for Materials Science, Institute of Metal Research, Chinese Academy of Sciences, Shenyang 110016, PR China

<sup>3</sup> School of Science, Shenyang University of Technology, Shenyang 110870, PR China

### Supporting information

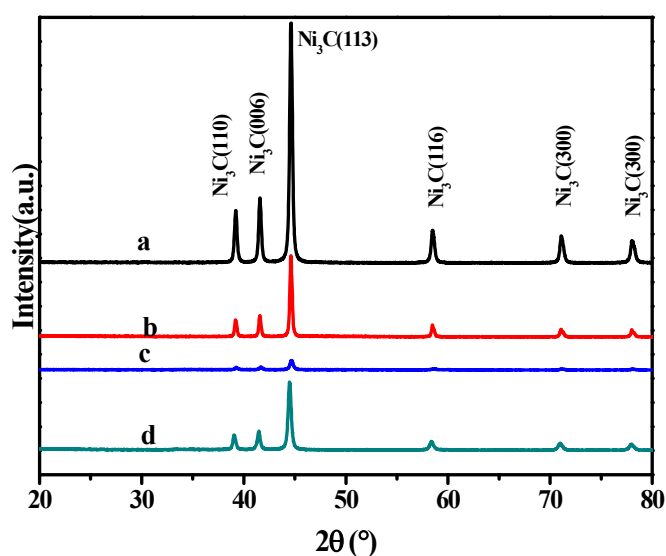

Figure S1 XRD patterns for the products under (a) 0 g; (b) 1 g; (c) 2 g; (d) 4 g TPPO

\* Corresponding author. E-mail address: [yjzhang2009@163.com](mailto:yjzhang2009@163.com) (Yajing Zhang); [dali@imr.ac.cn](mailto:dali@imr.ac.cn) (Da Li).

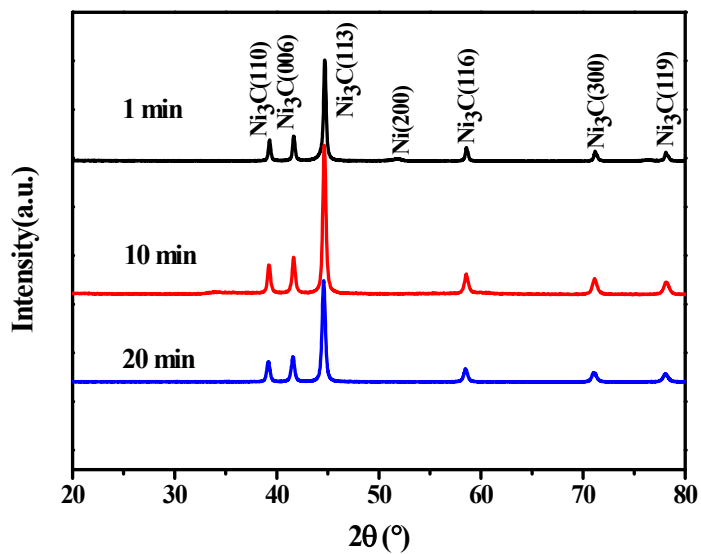

Figure S2 XRD patterns of products obtained under 300°C at different reaction time

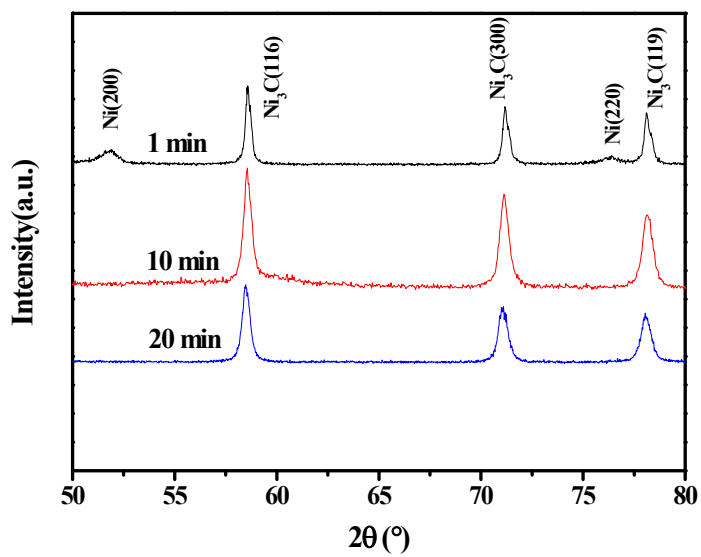

Figure S3 Enlarged XRD patterns of products obtained under 300°C at different reaction time

Ni (NO<sub>3</sub>)<sub>2</sub>•6H<sub>2</sub>O of 0.59 g (Adamas, 99.99%) and triphenylphosphine oxide (TPPO, Acros, 99%) of 1.0 g were dissolved in tetraethylene glycol (TEG, Acros, 99.5% ) of 50 mL. The solution was stirred constantly for 20 min at room temperature and the resulting green solution under argon atmosphere. And the solution was first heated to 110 °C for 20 min to remove a trace of water, then it was heated to 200 °C at heating rate of 6 °C per min, and 3 mL of N<sub>2</sub>H<sub>4</sub>•6H<sub>2</sub>O was dropped into the solution, and then the reaction was performed for 6 hours. At last, the obtained product was centrifuged, washed by ethanol for many times, and then dried in a vacuum oven at 80 °C for 12 h for characterization. There are Ni and Ni<sub>3</sub>C phases in the XRD pattern, and Ni is the main phase.

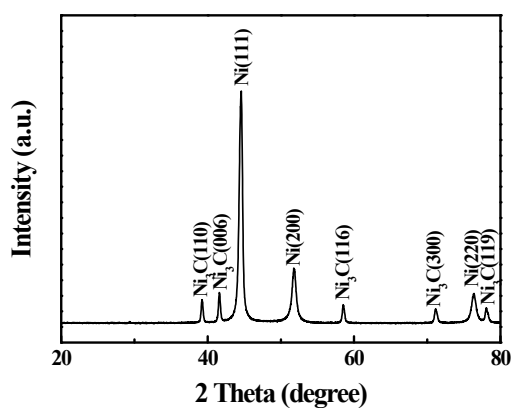

Figure S4 XRD pattern of product obtained under 200°C in TEG solution for 6 hours
